# Supplementary material
Source: MDPI journal article supplement (https://www.mdpi.com/1424-8247/16/10/1491)
Supplement: s1 [file s1]

*Supplementary Materials*

**In Vitro Synergistic Inhibitory Effects of Plant Extract Combinations  
on Bacterial Growth of Methicillin-Resistant *Staphylococcus aureus***

Jea-Young Jeong, In-Geun Jung, Seung-Hoon Yum, You-Jin Hwang

**Table S1. UPLC mobile phase gradient conditions**

| <b>Time (min)</b> | <b>Flow rate (mL/min)</b> | <b>Phase A (%)<sup>a</sup></b> | <b>Phase B (%)<sup>b</sup></b> |
|-------------------|---------------------------|--------------------------------|--------------------------------|
| 0.0               | 0.40                      | 92                             | 8                              |
| 1.0               | 0.40                      | 92                             | 8                              |
| 16.0              | 0.40                      | 30                             | 70                             |
| 17.0              | 0.40                      | 0                              | 100                            |
| 19.0              | 0.40                      | 0                              | 100                            |
| 19.3              | 0.40                      | 92                             | 8                              |
| 22.0              | 0.40                      | 92                             | 8                              |

<sup>a</sup> Phase A: Distilled water with 0.1% formic acid.

<sup>b</sup> Phase B: Acetonitrile with 0.1% formic acid.

**Table S2. Mass spectrometer operating conditions**

| Parameters              | Values                              |
|-------------------------|-------------------------------------|
| Desolvation gas         | N <sub>2</sub>                      |
| Desolvation flow rate   | 800 L/h                             |
| Desolvation temperature | 350 °C                              |
| Source temperature      | 110 °C                              |
| Capillary voltage       | 300 V                               |
| Cone voltage            | 40 V                                |
| Scan mode*              | ESI <sup>-</sup> / ESI <sup>+</sup> |
| <i>m/z</i> range        | 100-1500 Da                         |

\* ESI<sup>-</sup>: Negative electrospray ionization / ESI<sup>+</sup>: Positive electrospray ionization.

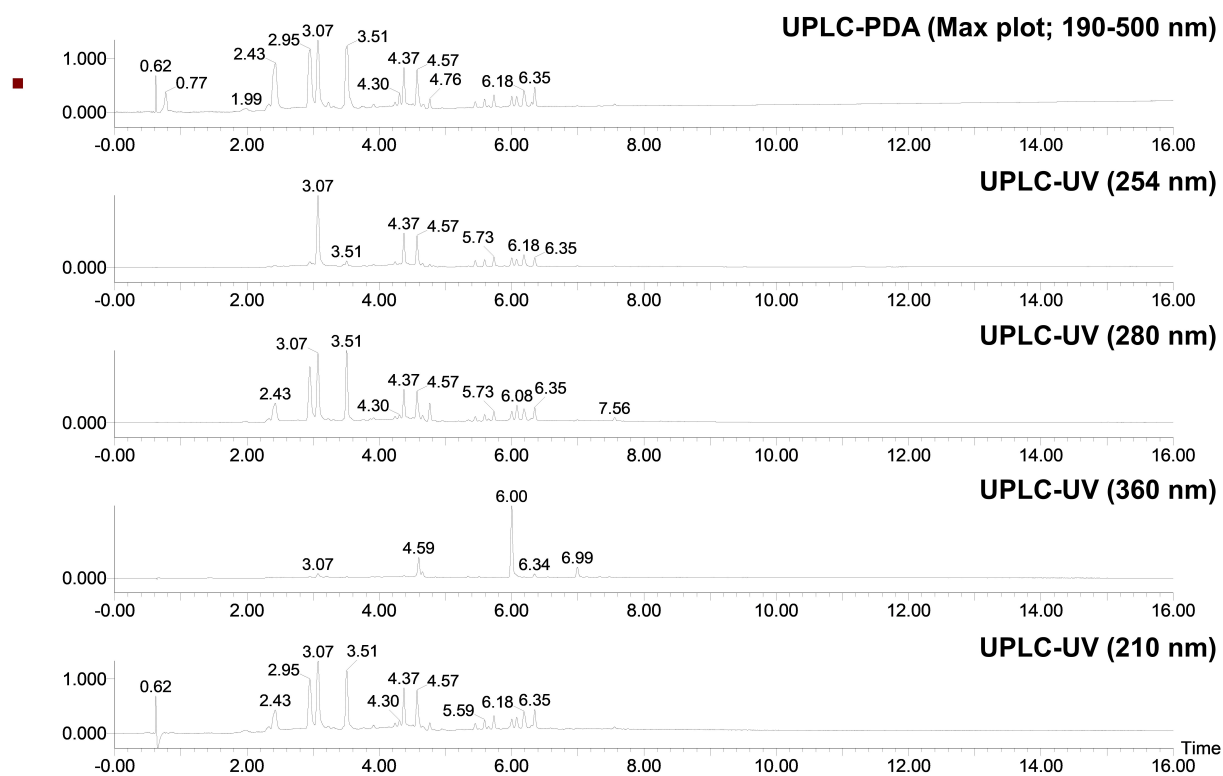

**Supplementary Figure S1. UPLC chromatograms of 70% ethanol extracts (3 mg/mL) from *Caesalpinia sappan* L.** The analysis conditions were set as follows: Column, ACQUITY UPLC BEH C18 1.7  $\mu$ m column (2.1 x 100 mm); column temperature, 35  $^{\circ}$ C; flow rate, 0.4 mL/min; sample injection volume, 1  $\mu$ L; detection wavelength, max plot (190-500 nm), 210 nm, 254 nm, 280 nm, and 360 nm. The mobile phase gradient conditions were set as described in Table S1.



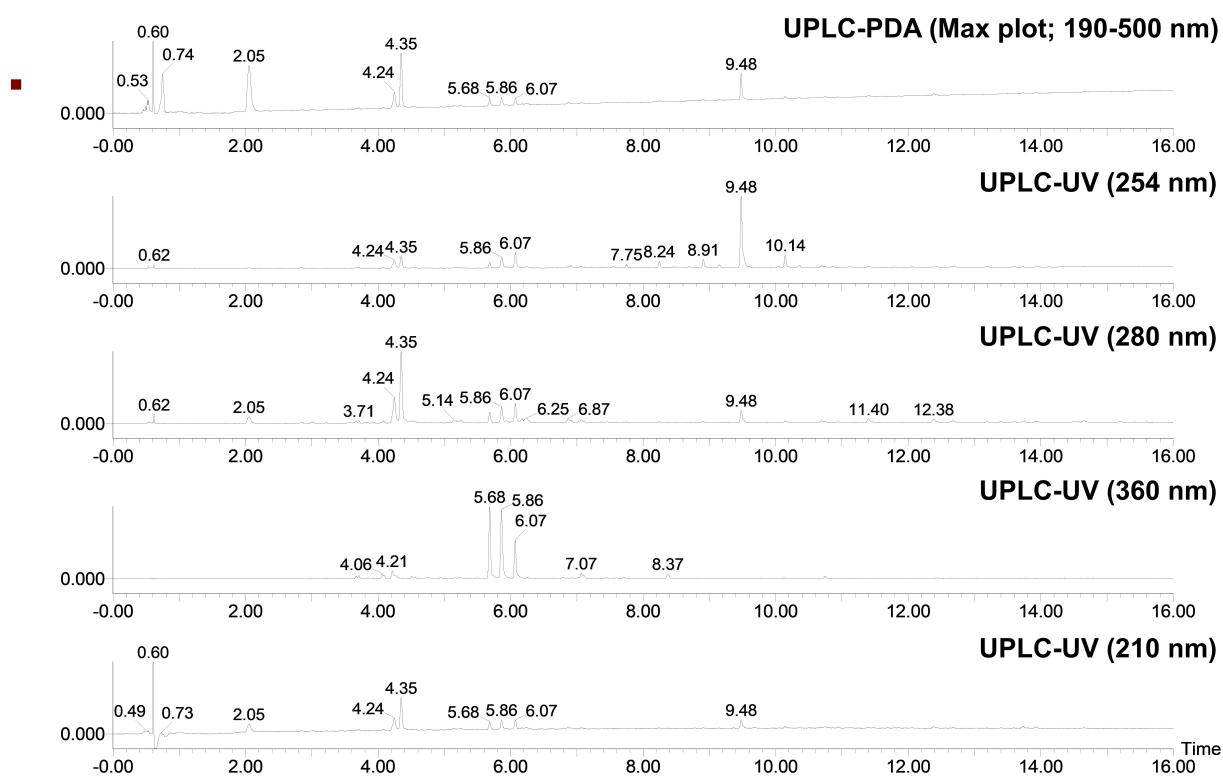

**Supplementary Figure S2. UPLC chromatograms of 70% ethanol extracts (3 mg/mL) from *Glycyrrhiza uralensis* Fisch.** The analysis conditions were set as follows: Column, ACQUITY UPLC BEH C18 1.7  $\mu$ m column (2.1 x 100 mm); column temperature , 35  $^{\circ}$ C; flow rate, 0.4 mL/min; sample injection volume, 1  $\mu$ L; detection wavelength, max plot (190-500 nm), 210 nm , 254 nm , 280 nm , and 360 nm . The mobile phase gradient conditions were set as described in Table S1.

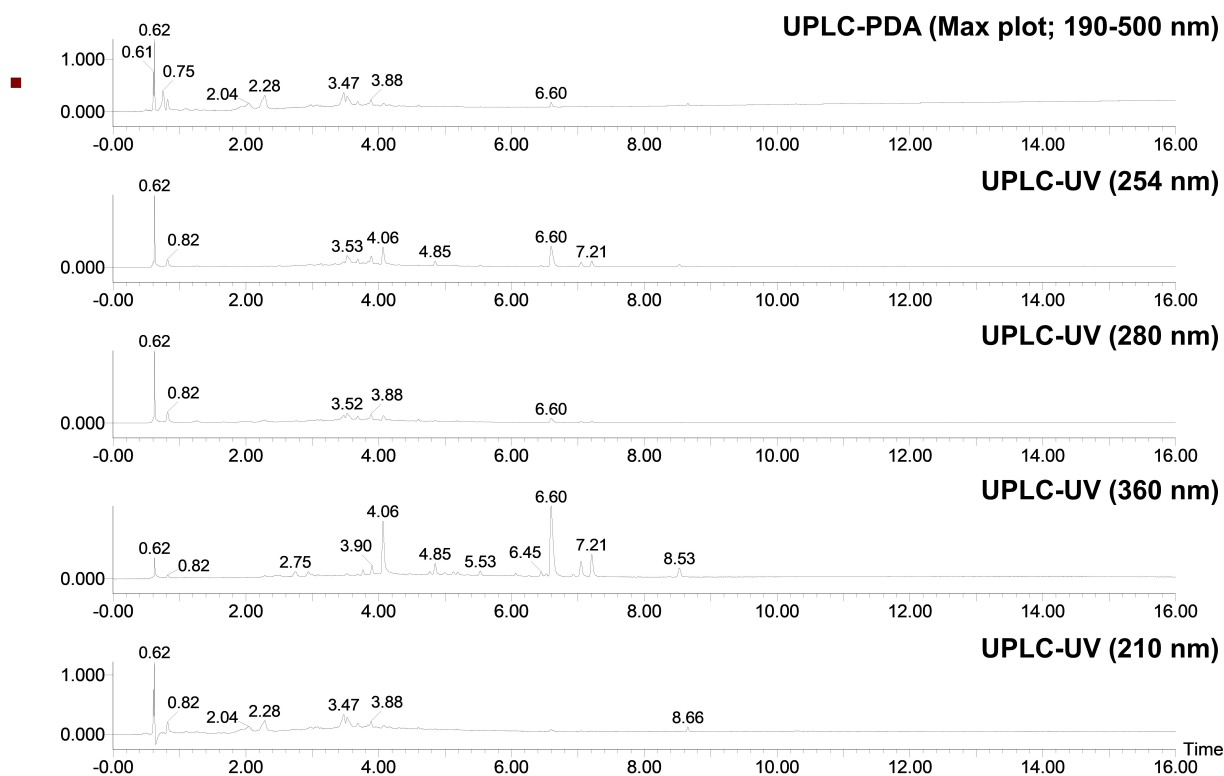

**Supplementary Figure S3. UPLC chromatograms of 70% ethanol extracts (3 mg/mL) from *Sanguisorba officinalis* L.** The analysis conditions were set as follows: Column, ACQUITY UPLC BEH C18 1.7  $\mu$ m column (2.1 x 100 mm); column temperature, 35  $^{\circ}$ C; flow rate, 0.4 mL/min; sample injection volume, 1  $\mu$ L; detection wavelength, max plot (190-500 nm), 210 nm , 254 nm , 280 nm , and 360 nm . The mobile phase gradient conditions were set as described in Table S1.

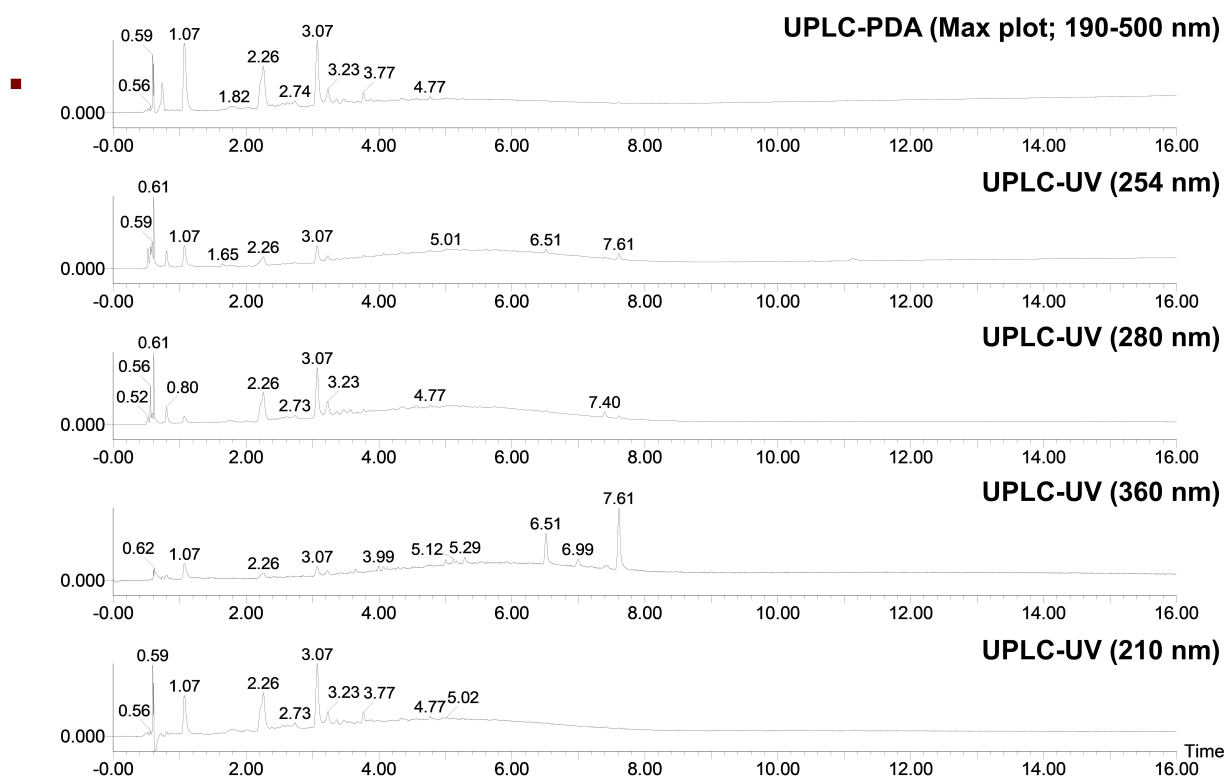

**Supplementary Figure S4. UPLC chromatograms of 70% ethanol extracts (3 mg/mL) from *Uncaria gambir* Roxb.** The analysis conditions were set as follows: Column, ACQUITY UPLC BEH C18 1.7  $\mu$ m column (2.1 x 100 mm); column temperature, 35  $^{\circ}$ C; flow rate, 0.4 mL/min; sample injection volume, 1  $\mu$ L; detection wavelength, max plot (190-500 nm), 210 nm , 254 nm , 280 nm , and 360 nm . The mobile phase gradient conditions were set as described in Table S1.

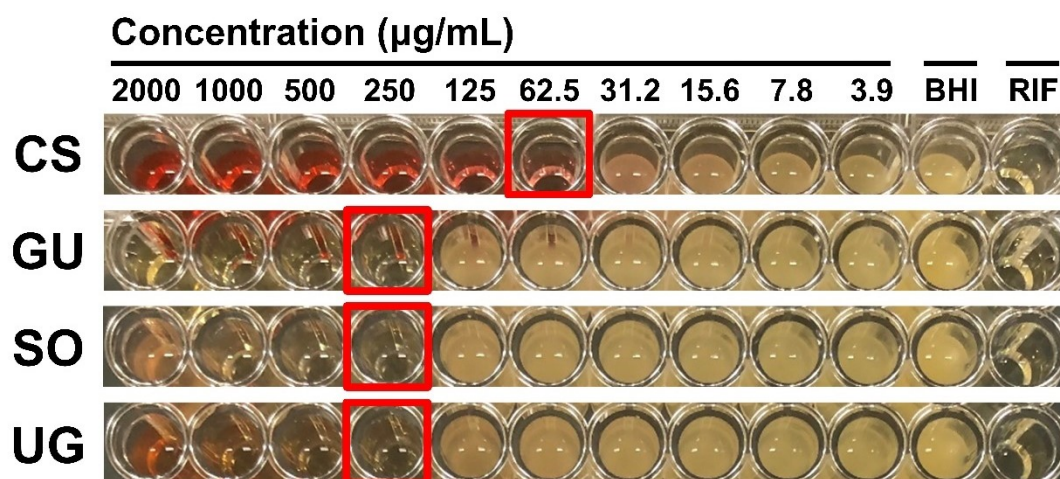

**Supplementary Figure S5. Determination of minimum inhibitory concentration (MIC) of selected medicinal plants using broth microdilution method .CS: *Caesalpinia sappan* L.; GU: *Glycyrrhiza uralensis* Fisch.; SO: *Sanguisorba officinalis* L.; UG: *Uncaria gambir* Roxb. Red squares indicate the MICs of ethanol extracts .Brain heart infusion (BHI) broth was served as a negative control, while rifampicin (RIF; 0.08  $\mu\text{g/mL}$ ) was a positive control.**



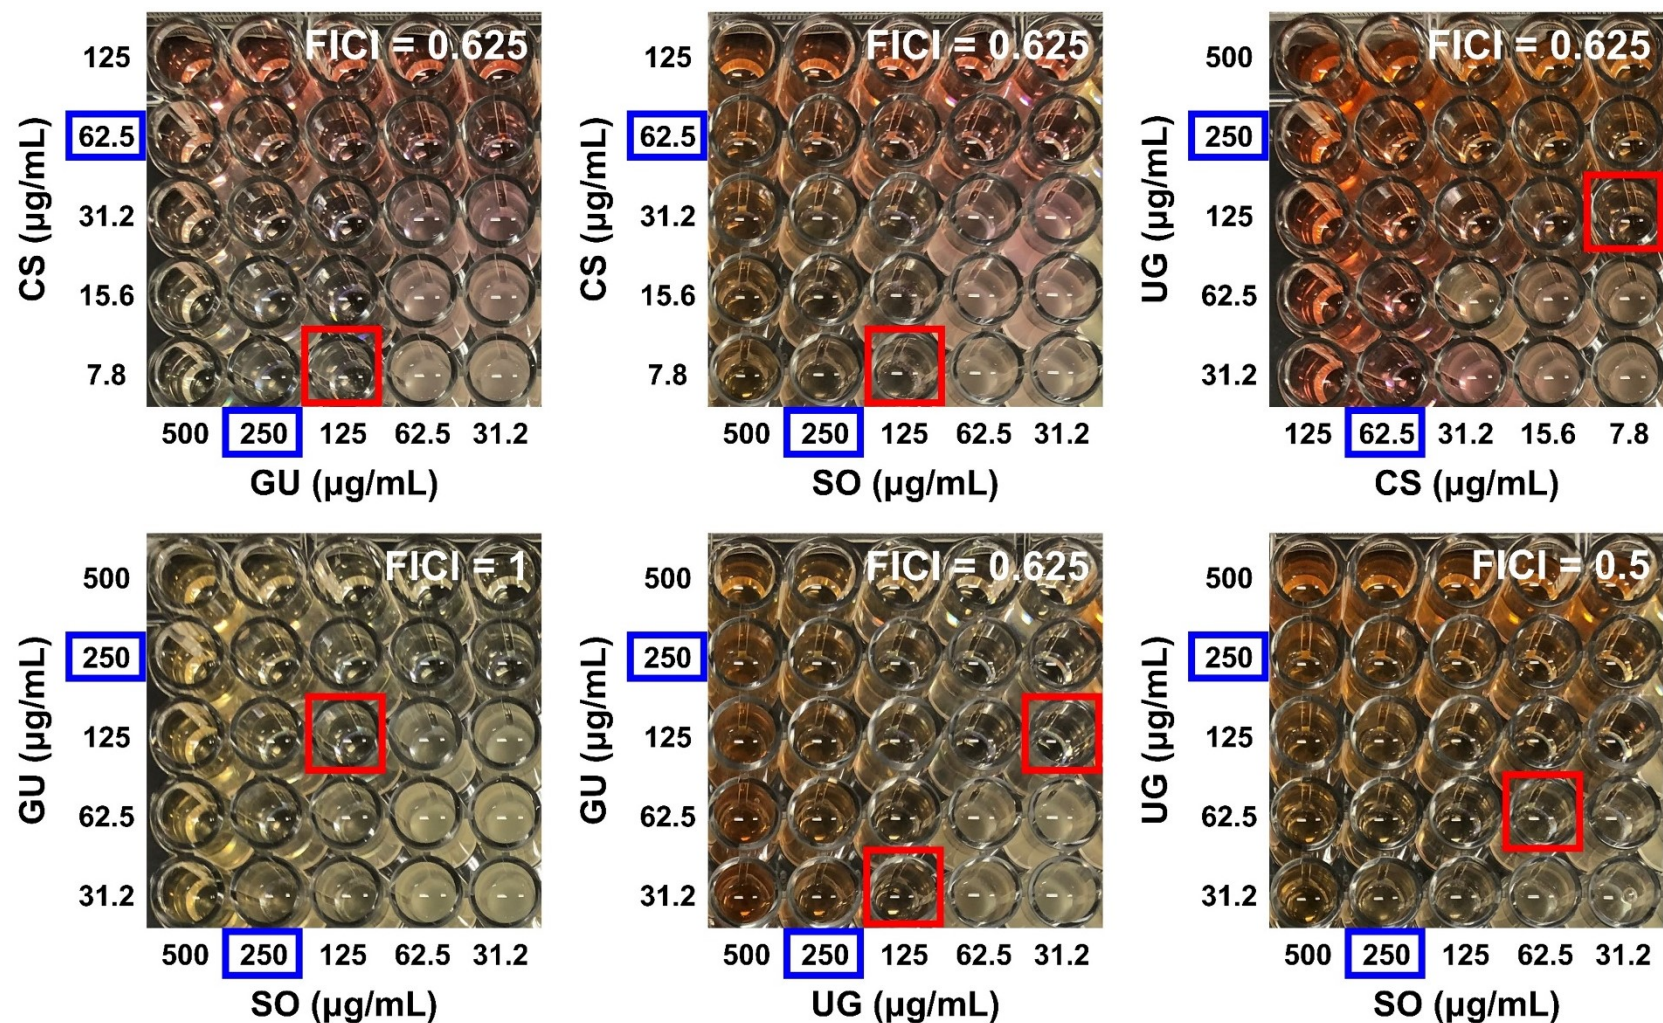

**Supplementary Figure S6. Evaluation of synergistic inhibitory effects of plant extract combinations by checkerboard synergy assays .** CS: *Caesalpinia sappan* L.; GU: *Glycyrrhiza uralensis* Fisch.; SO: *Sanguisorba officinalis* L.; UG: *Uncaria gambir* Roxb. Red squares indicate the MICs of plant extract combinations. Blue squares indicate the MICs of individual extracts.
